# Supplementary material for: Dipole Pattern of Summer Ozone Pollution in the east of China and Its Connection with Climate Variability
Source: Copernicus journal article supplement (doi:10.5194/acp-2021-613), 2021-08-24
Supplement: Supplementary file 1 [file acp-2021-613-supplement.pdf]

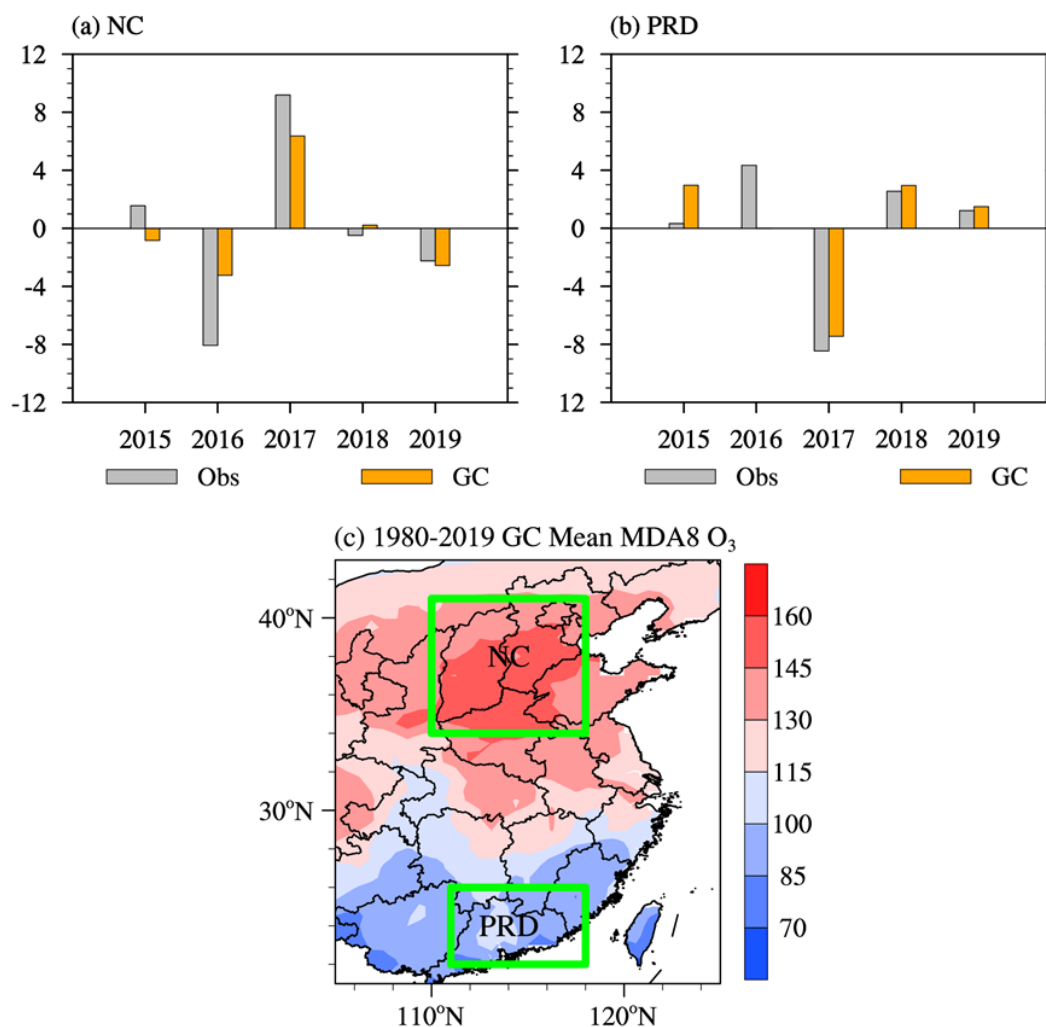

**Figure S1.** Histogram of JJA mean observed (gray) and simulated (orange) MDA8 O<sub>3</sub> after detrending in NC (a) and PRD (b) from 2015 to 2019. (c) Spatial distribution of GEOS-Chem simulated MDA8 O<sub>3</sub> (unit:  $\mu\text{g m}^{-3}$ ) in summer from 1980 to 2019. The simulated O<sub>3</sub> concentrations were produced by GEOS-Chem with fixed emissions but changing meteorological conditions from 1980 to 2019. The green boxes in panels (c) indicate the locations of NC and PRD.

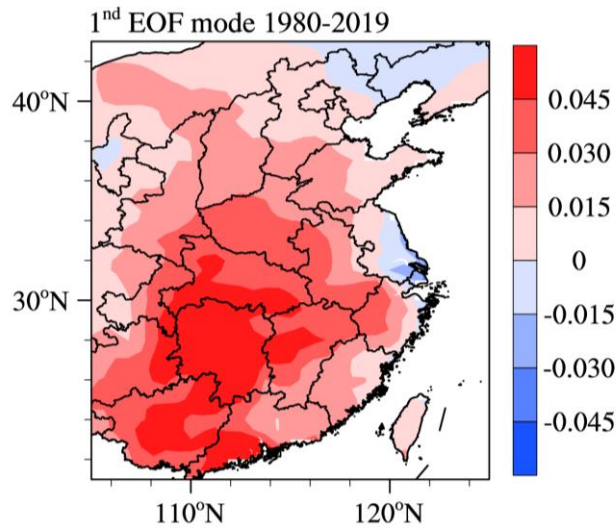

**Figure S2.** The first EOF pattern of simulated MDA8 O<sub>3</sub> in summer from 1980 to 2019. The simulated O<sub>3</sub> concentrations were produced by GEOS-Chem with fixed emissions but changing meteorological conditions.

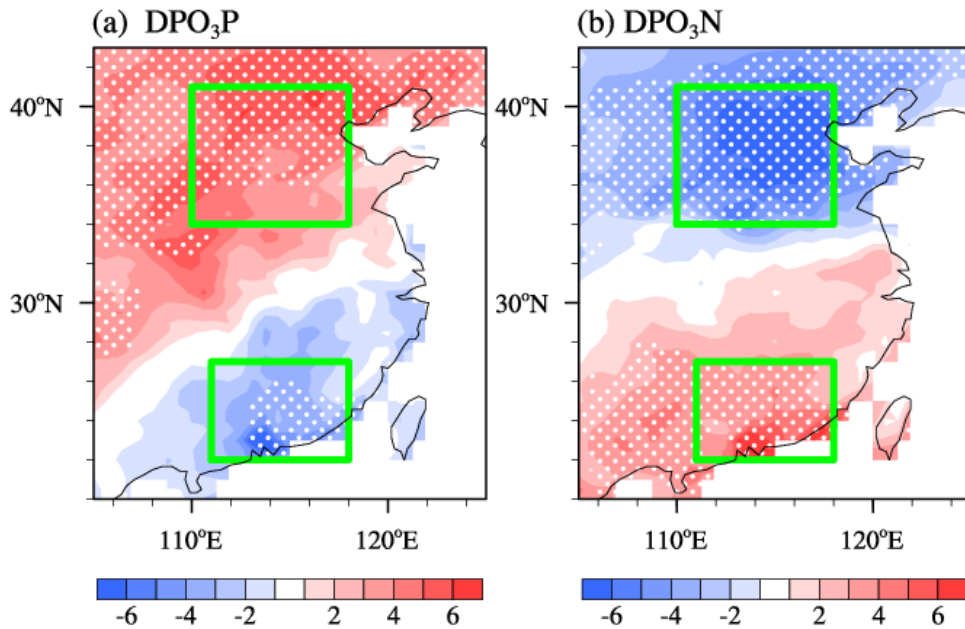

**Figure S3.** Composites of the simulated MDA8 O<sub>3</sub> (unit:  $\mu\text{g m}^{-3}$ ) after detrending for DPO<sub>3</sub> in summer from 1980 to 2019. Panel (a) is composited when the time coefficient of DPO<sub>3</sub> is greater than one standard deviation (DPO<sub>3</sub>P), while panels (b) is composited when the time coefficient is less than  $-1 \times$  a standard deviation (DPO<sub>3</sub>N). The green box in panels (a) and (b) are the NC and PRD areas.

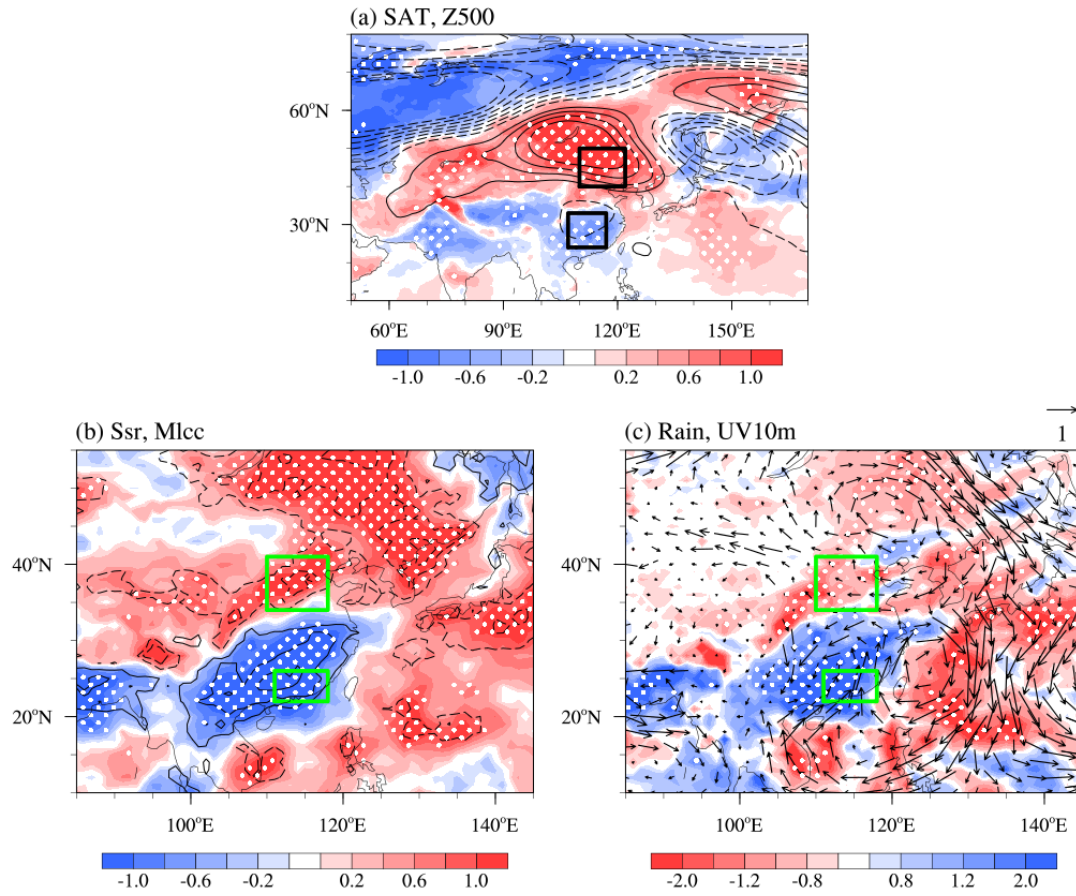

**Figure S4.** Composites of summer atmospheric circulations associated with the  $SI_{FJL}$  ( $SI_{FJLP}$  minus  $SI_{FJLN}$ ) from 1980 to 2019: (a) surface air temperature (unit: K, shading) and geopotential height at 500 hPa (unit: gpm, contours), (b) downward solar radiation at the surface (unit:  $10^6 \text{ J m}^{-2}$ , shading) and the sum of low and medium cloud cover (unit: 1, contours), and (c) precipitation (unit: mm, shading) and surface wind (unit:  $\text{m s}^{-1}$ , arrows). The white dots indicate that the differences with shading was above the 90% confidence level. The green boxes in panels (b) and (c) are the NC and PRD regions. The black boxes in panel (a) mean the centers of the  $AAC_{NC}$  and  $AC_{PRD}$ , respectively.

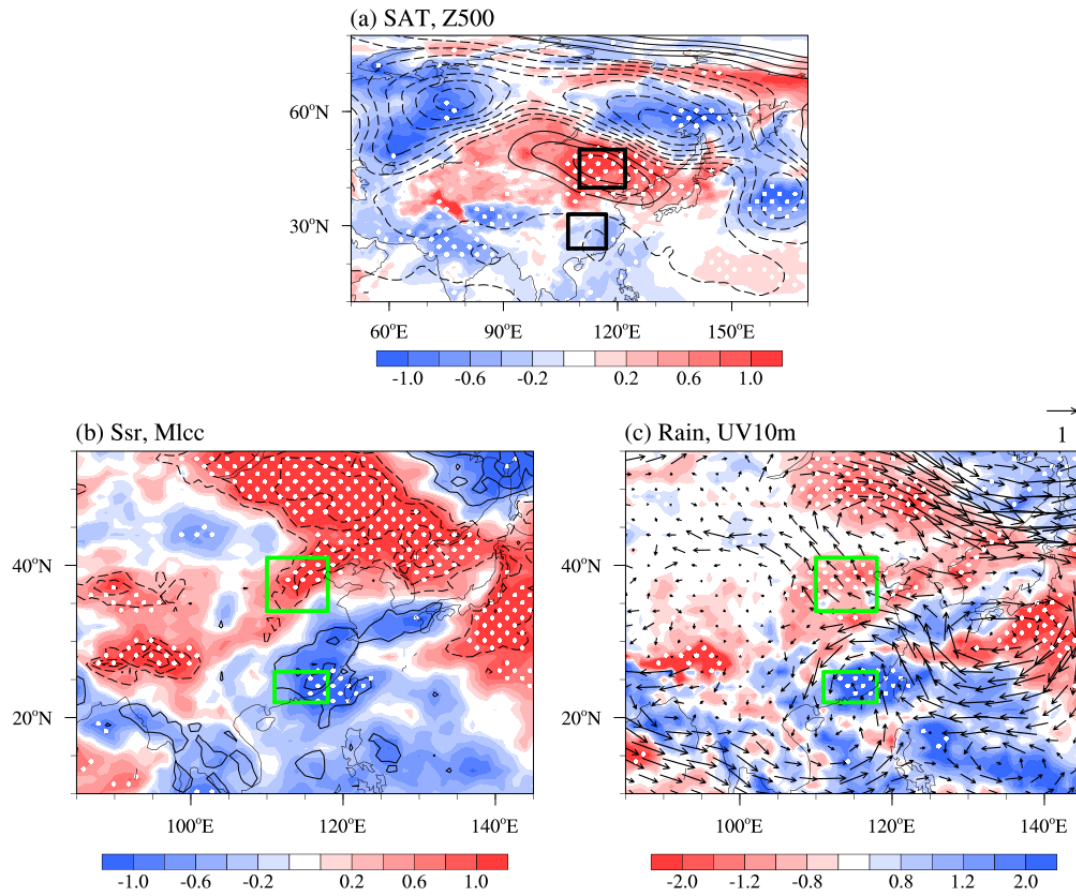

**Figure S5.** Composites of summer atmospheric circulations associated with the SIOD (SIODP minus SIODN) from 1980 to 2019: (a) surface air temperature (unit: K, shading) and geopotential height at 500 hPa (unit: gpm, contours), (b) downward solar radiation at the surface (unit:  $10^6 \text{ J m}^{-2}$ , shading) and the sum of low and medium cloud cover (unit: 1, contours), and (c) precipitation (unit: mm, shading) and surface wind (unit:  $\text{m s}^{-1}$ , arrows). The white dots indicate that the differences with shading was above the 90% confidence level. The green boxes in panels (b) and (c) are the NC and PRD regions. The black boxes in panel (a) mean the centers of the AAC<sub>NC</sub> and AC<sub>PRD</sub>, respectively.

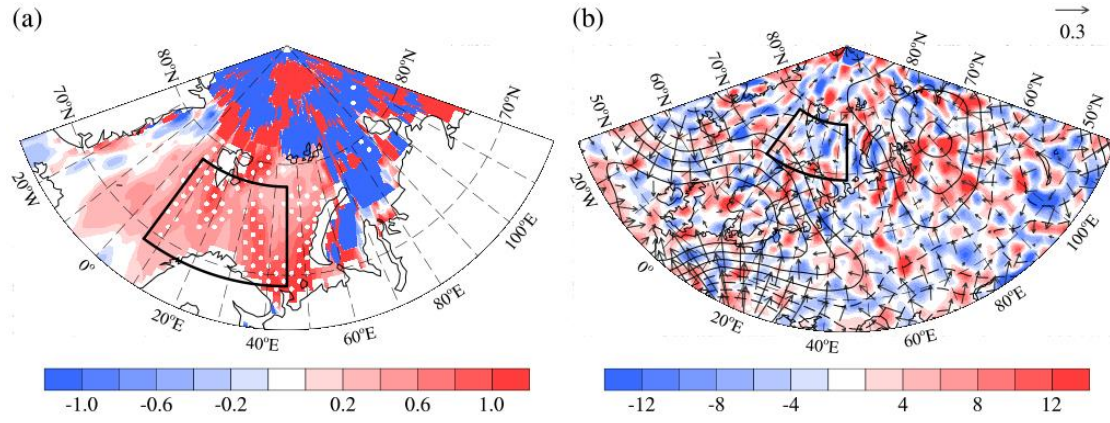

**Figure S6.** Composites of summer (a) Arctic SST (unit: K) on the time series of sign reversed  $\text{SI}_{\text{FJL}}$  index ( $\text{SI}_{\text{FJL}}^{\text{N}}$  minus  $\text{SI}_{\text{FJL}}^{\text{P}}$ ). The black box is used to calculate the Arctic SST index associated with  $\text{SI}_{\text{FJL}}$  in panels (a). The white dots indicate that the differences with shading was above the 90% confidence level. (b) Composites of JJA Rossby wave source (unit:  $10^{-11} \text{ s}^{-2}$ , shading), velocity potential (unit:  $10^5 \text{ m}^2 \text{ s}^{-1}$ , contour) and divergent wind (unit:  $\text{m s}^{-1}$ , vector) at 500 hPa on the time series of the Arctic SST index associated with  $\text{SI}_{\text{FJL}}$ .

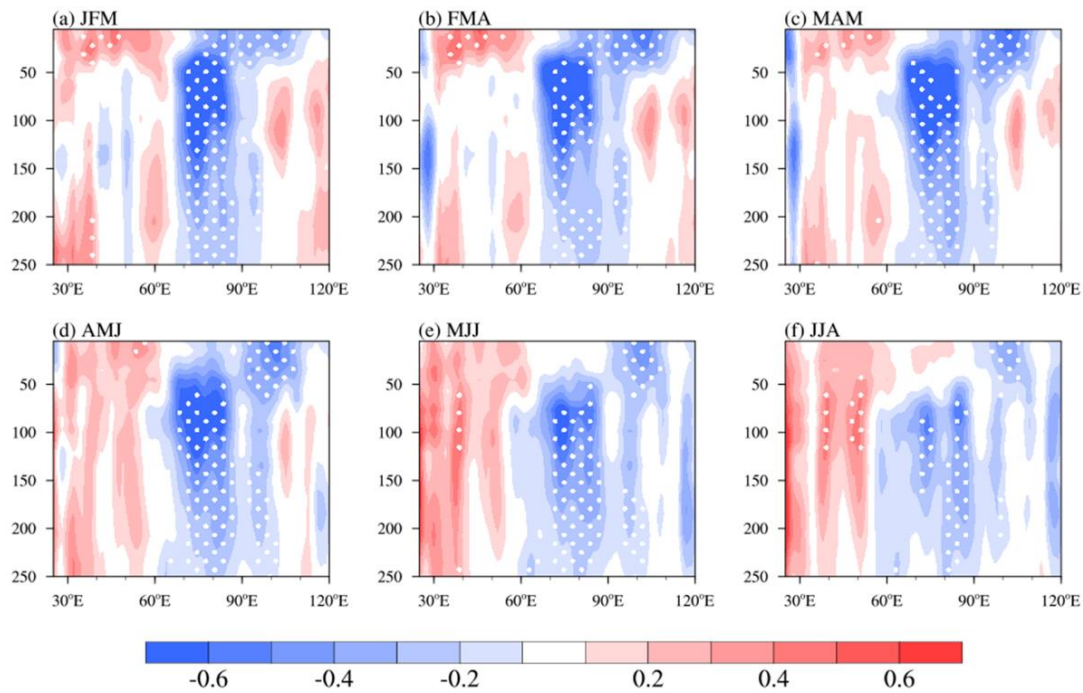

**Figure S7.** Composites of summer 5–45°S mean subsurface ocean temperature (unit: K) associated with the SIOD (i.e.,  $\text{SIODP}$  minus  $\text{SIODN}$ ) in (a) JFM, (b) FMA, (c) MAM, (d) AMJ, (e) MJJ, and (f) JJA from 1980 to 2019. The white dots indicate that the differences with shading was above the 90% confidence level.
